# Supplementary material
Source: MDPI journal article supplement (https://www.mdpi.com/2075-163X/10/10/920)
Supplement: s1 [file s1]

Archive with 2 entries (2 files):
- minerals-917819 supplementary XML.pdf
- minerals-917819 supplementary XML.docx
